# Supplementary material for: Characterization of Phase Transition in the Thalamocortical System during Anesthesia-Induced Loss of Consciousness
Source: PLoS One. 2012 Dec 7;7(12):e50580. doi: 10.1371/journal.pone.0050580 (PMC3517525; doi:10.1371/journal.pone.0050580)
Supplement: Table S1 — The parameters without asterisks are fixed ones, determined from the plasma concentration-time profiles of ketamine. Those with asterisks are adjustable ones, derived from the time profile of plasma levels of ketamine and/or the behavioral reference points i.e., t ADM, t LOM, and t ROM. The values with dagger (†) were expressed as means±standard deviation. (DOCX) [file pone.0050580.s003.docx]

Table S1. Model Parameters

| **Parameter** | **Value** | **Unit** |
| --- | --- | --- |
|  | *0.705 ± 0.265† | min-1 |
| α | *0.111 ± 0.0246† | min-1 |
| β | 0.00508 | min-1 |
|  | 0.0684 | min-1 |
|  | 0.0262 | min-1 |
|  | 0.0215 | min-1 |
